# Supplementary material for: Brainstem tumors may increase the impairment of behavioral emotional cognition in children
Source: PubMed Central journal article supplement (PMC9722802; doi:10.1007/s11060-022-04161-x), 2022-11-04
Supplement: 11060_2022_4161_MOESM1_ESM.pdf [file 11060_2022_4161_MOESM1_ESM.pdf]

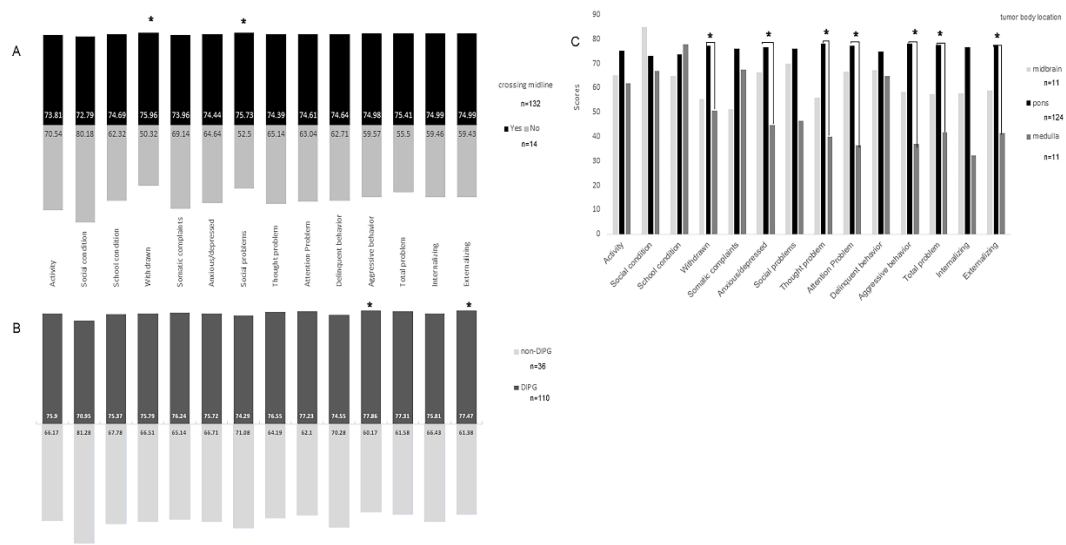

Supplementary fig 1

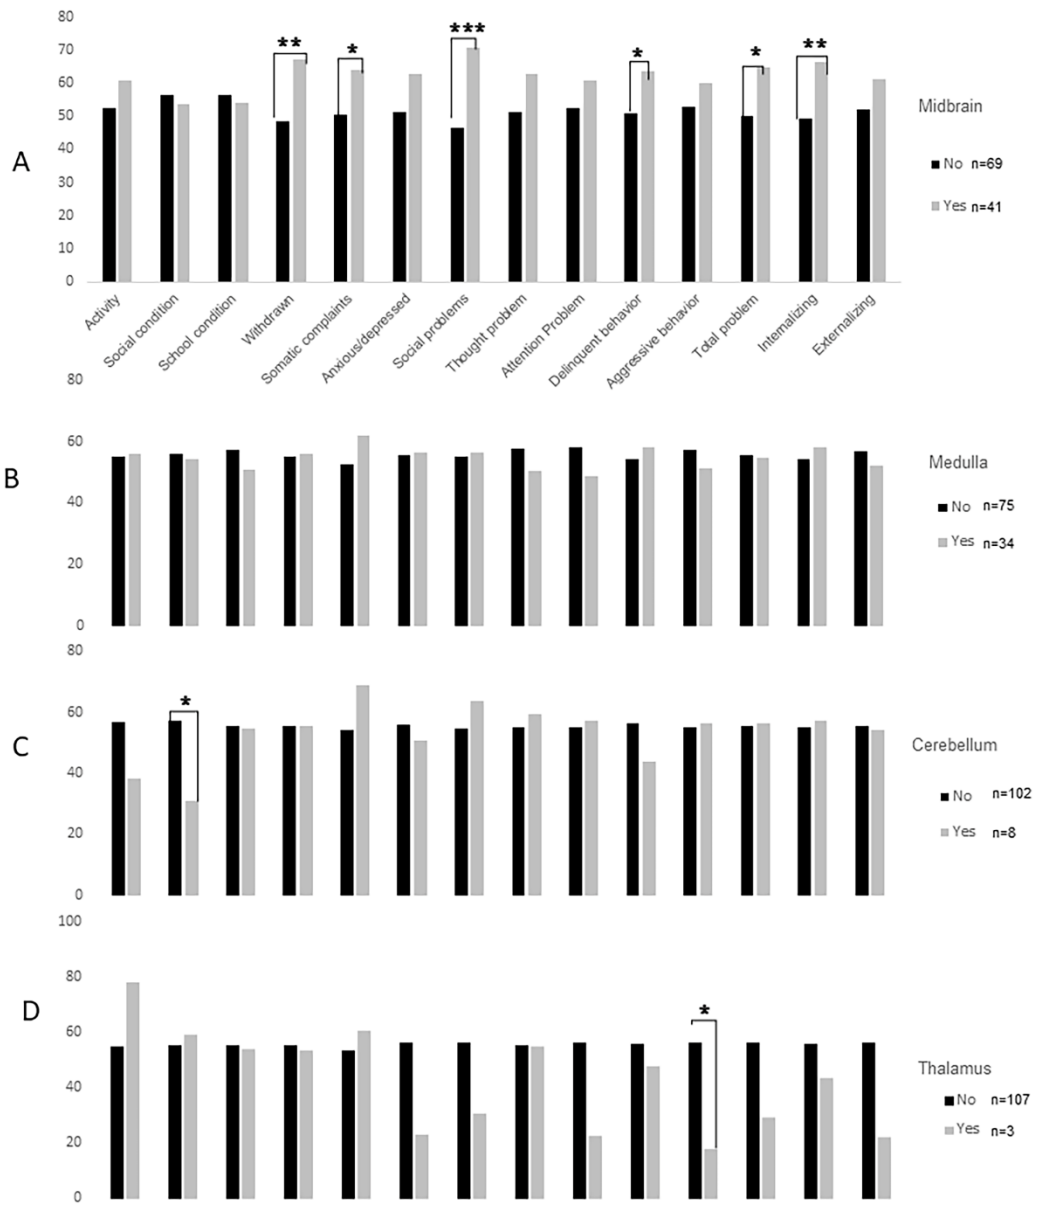

Supplementary fig 2

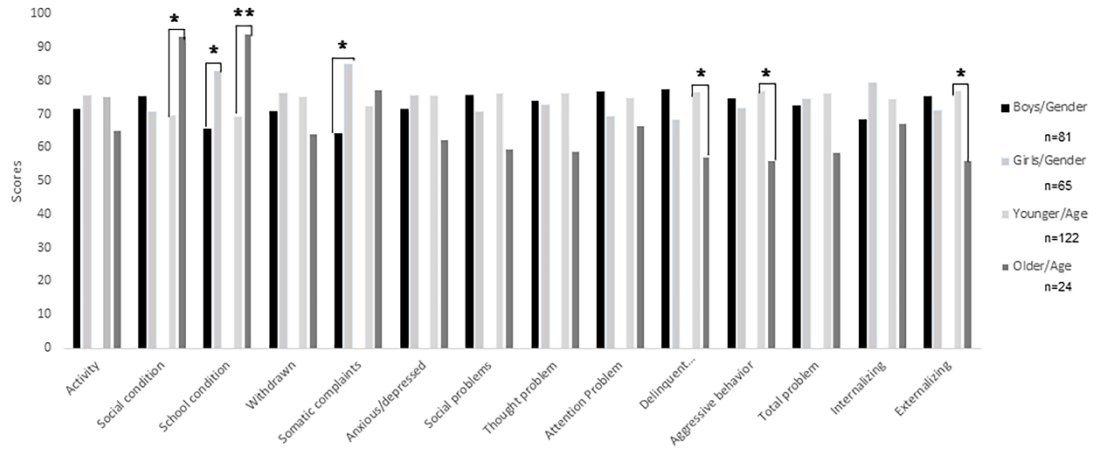

Supplementary fig 3
